# Supplementary material for: Molecular determinants of the adrenal gland functioning related to stress-sensitive hypertension in ISIAH rats
Source: PubMed Central journal article supplement (PMC5249038; doi:10.1186/s12864-016-3354-2), 2016-12-28

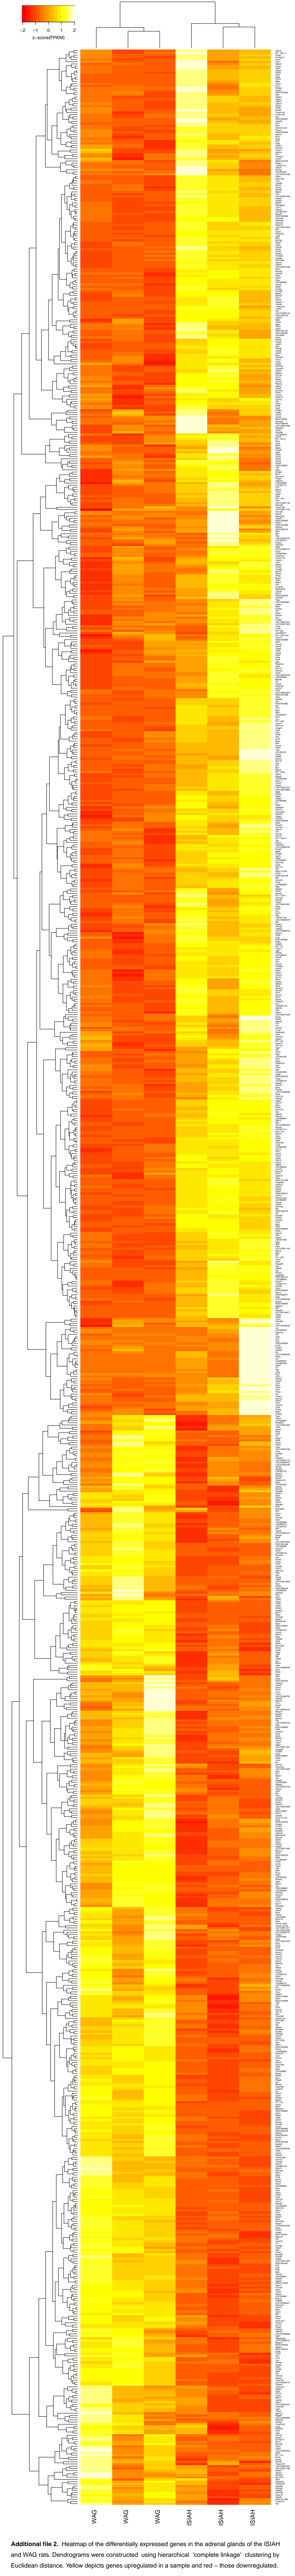

Supplement: 12864_2016_3354_MOESM2_ESM.pdf [file 12864_2016_3354_MOESM2_ESM.pdf]
